# Supplementary material for: Cost-related medication nonadherence in Canada: a systematic review of prevalence, predictors, and clinical impact
Source: Springer Nature journal article supplement (doi:10.1186/s13643-020-01558-5), 2021-01-06
Supplement: MOESM2 [file 18741874]

## APPENDIX 1. MEDLINE Search Strategy

Database: OVID Medline Epub Ahead of Print, In-Process & Other Non-Indexed Citations, Ovid MEDLINE(R)  
Daily and Ovid MEDLINE(R) 1946 to Present  
Search Strategy:

-----  
1 \*Medication Adherence/ (8545)  
2 Patient Compliance/ (54949)  
3 persisten\$.mp. (286317)  
4 adheren\$.mp. (159735)  
5 complian\$.mp. (157679)  
6 1 or 2 or 3 or 4 or 5 (572582)  
7 Drug Costs/ (14578)  
8 Prescription Fees/ (1123)  
9 Fees, Pharmaceutical/ (1269)  
10 cost sharing.mp. (3230)  
11 co-pay.mp. (78)  
12 "Deductibles and Coinsurance"/ (1631)  
13 self-pay.mp. (575)  
14 out-of-pocket.mp. (4212)  
15 Insurance Coverage/ (11433)  
16 7 or 8 or 9 or 10 or 11 or 12 or 13 or 14 or 15 (34851)  
17 exp Canada/ (145847)  
18 canadian\$.mp. (52774)  
19 (British Columbia\$ or alberta\$ or saskatchewan\$ or manitoba\$).mp. [mp=title, abstract, original title, name of substance word, subject heading word, keyword heading word, protocol supplementary concept word, rare disease supplementary concept word, unique identifier, synonyms] (31518)  
20 (ontari\$ or quebec\$ or new brunswick\$ or nova scotia\$).mp. [mp=title, abstract, original title, name of substance word, subject heading word, keyword heading word, protocol supplementary concept word, rare disease supplementary concept word, unique identifier, synonyms] (59631)  
21 (prince edward island\$ or newfoundland\$ or yukon\$ or northwest territor\$ or nunavut\$).mp. [mp=title, abstract, original title, name of substance word, subject heading word, keyword heading word, protocol supplementary concept word, rare disease supplementary concept word, unique identifier, synonyms] (4260)  
22 17 or 18 or 19 or 20 or 21 (188579)  
23 6 and 16 and 22 (66)  
\*\*\*\*\*
